# Supplementary material for: Safety, efficacy and determinants of response of allogeneic CD19-specific CAR-NK cells in CD19+ B cell tumors: a phase 1/2 trial
Source: Springer Nature journal article supplement (doi:10.1038/s41591-023-02785-8), 2024-01-18
Supplement: MOESM1 [file 41591_2023_2785_MOESM1_ESM.pdf]

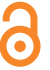

---

# **Safety, efficacy and determinants of response of allogeneic CD19-specific CAR-NK cells in CD19<sup>+</sup> B cell tumors: a phase 1/2 trial**

---

In the format provided by the authors and unedited

**Safety, efficacy and determinants of response of Allogeneic CD19-specific CAR-NK cells in CD19+ B cell tumors: a phase 1/2 trial**

**Supplementary Figures and Tables**

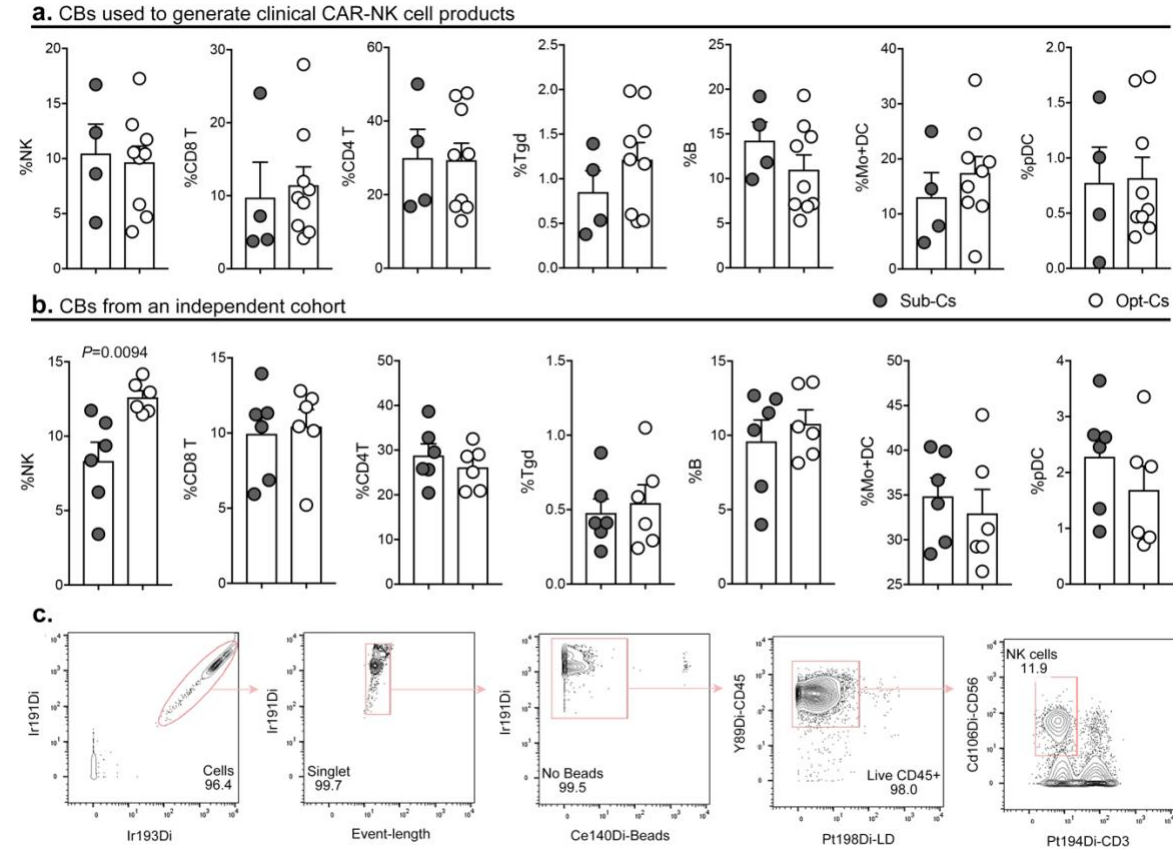

**Supplementary Figure 1. Immune composition of cord blood mononuclear cells (CBMCs) used for the generation of the clinical CAR19/IL-15 NK cell products and validated in an independent CBMC cohort.** We used cryopreserved CBMCs that were stored in our cord bank from each of the cords used to manufacture the clinical CAR19/IL-15 CB-NK cell product to characterize differences in the composition of the immune subsets between Opt-Cs (n=9 donors) and Sub-Cs (n=4 donors) in the experiment described in panel **a**. For the experiment described in panel **b** we analyzed CBMCs from an independent cohort of CB units from our bank, Sub-Cs (n=6 donors) and Opt-Cs (n=6 donors). (**a** and **b**) Bar plots showing the frequencies of NK cells (CD45+CD56+CD3-), CD8 T cells (CD45+CD56-CD3+CD8+), CD4 T cells (CD45+CD56-CD3+CD4+), gamma-delta T (Tgd) cells (CD45+CD56-CD3+TCRgd+), B cells (CD45+CD56-CD3-CD19+CD20+), monocytes (Mo) + dendritic cells (DC) (CD45+CD56-CD3-CD14+CD11c+), and plasmacytoid DCs (pDC) (CD45+CD56-CD3-CD11c+CD123+). (**c**) Gating strategy for the immunophenotyping of NK cells from CBMCs by CyTOF. Single live cells were identified based

on natural-abundance Iridium selection, bead depletion and Live/Dead separation. Hematopoietic cells within the live population were then selected by gating on hCD45+. Differential expressions of CD56 and CD3 were used to identify NK cells (CD56+CD3-). P-values were determined by two-tailed Student's t test and shown as mean + s.e.m. Non-significant P-values were not added to the figures. Each symbol represents an individual CB unit sample.

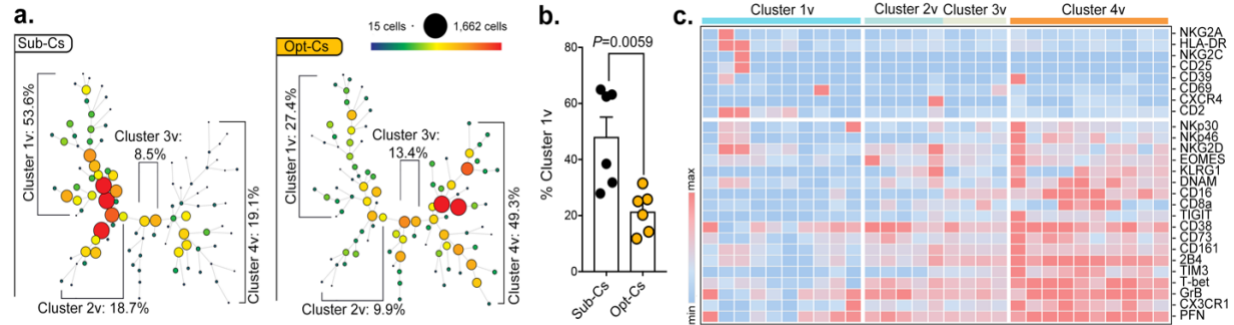

**Supplementary Figure 2. Unmanipulated NK cells derived from CBMCs of Opt-Cs or Sub-Cs display distinct phenotypes.** To validate the results presented in Fig. 3, we used CBMCs from an independent cohort of CBs from our bank. **(a)** SPADE analysis of CyTOF data showing the phenotype of unmanipulated live hCD45<sup>+</sup>CD56<sup>+</sup>CD3<sup>-</sup> NK cells in CBMCs of Sub-Cs (n=6 donors) or Opt-Cs (n=6 donors). The phenotypic signatures of collected NK cells were evaluated by CyTOF, downsampled to 10,000 cells per sample, pooled and separated into two categories: Sub-Cs vs. Opt-Cs. Clustering by SPADE revealed four main clusters (Clusters 1v-4v). Frequencies of each cluster are indicated; size and color of nodes represent numbers of clustered cells. **(b)** Bar graph shows the percentage (%) of NK cells within Cluster 1v in CBMCs from Sub-Cs vs. Opt-Cs. **(c)** Heatmap representing the expression levels of NK cell markers within the main sub-clusters of Cluster 1v-4v. Each column represents a major node within the SPADE tree clusters. The major nodes are those that are representative of the majority of cells across all conditions. The expression level for each marker is represented on a color scale ranging from the color blue (low) to the color red (high). P-values were determined by two-tailed Student's t test and data shown as mean + s.e.m. Each symbol represents an individual sample.

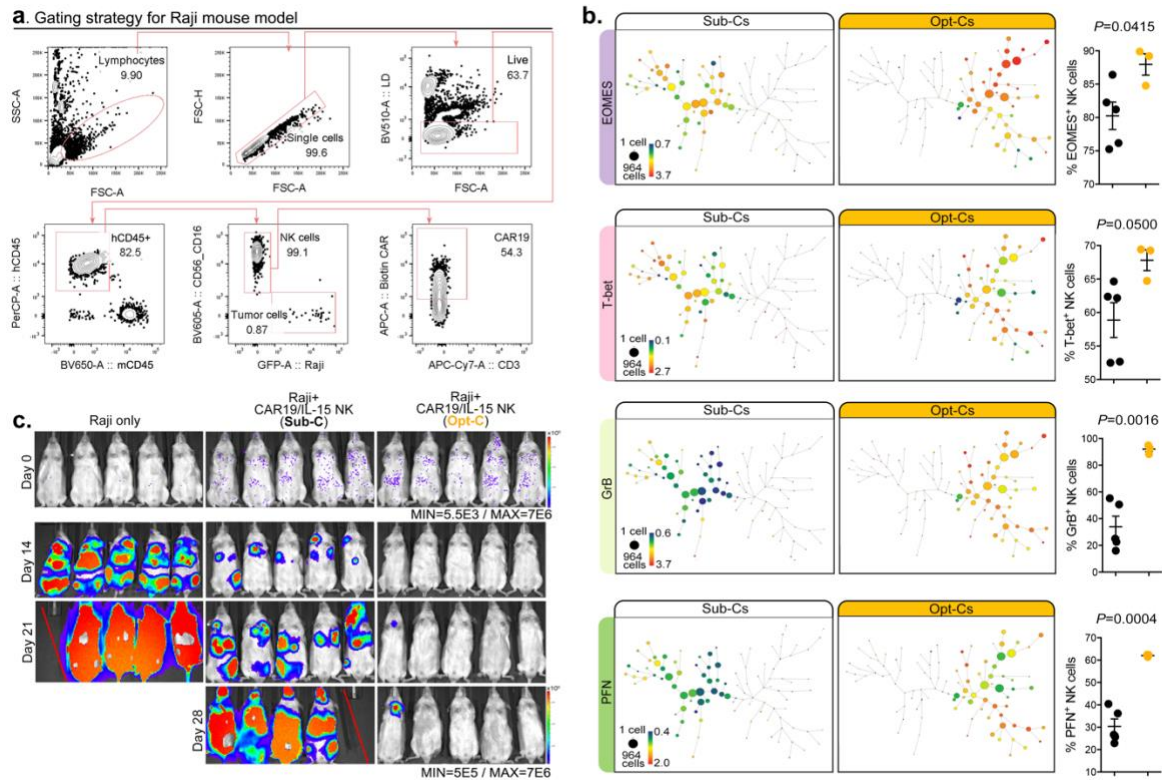

**Supplementary Figure 3. CAR-NK cells derived from Opt-Cs show superior anti-tumor effector function in a Raji mouse model.** (a) Gating strategies for NK cells and tumor cells for the *in vivo* Raji mouse model experiments presented in **Extended Data Fig. 9**. (b) SPADE analysis of live hCD45<sup>+</sup>CD56<sup>+</sup>CD3<sup>-</sup> NK cells in the bone marrow (BM) of mice collected 14 days after CAR19/IL-15 NK-cell injection. The phenotypic signatures of all gated NK cells were evaluated by CyTOF, downsampled to 10,000 cells per sample, pooled and divided into two categories: Sub-Cs vs. Opt-Cs. SPADE analysis was used to visualize the phenotypic differences between the two groups. The mean expression levels for the key NK cell markers EOMES, T-bet, GrB, and PFN are shown for each sub-cluster. The dot plots show the frequencies of NK cells expressing the marker of interest (Sub-Cs; n=5 mice vs. Opt-Cs; n=3 mice). (c) Bioluminescence imaging (BLI) corresponding to the Raji mouse model treated with CAR19/IL-15 NK cells described in **Extended Data Fig. 9f**. P-values were determined by two-tailed Student's t test. Data were analyzed by CyTOF and shown as mean ± s.e.m. Each symbol represents an individual sample.

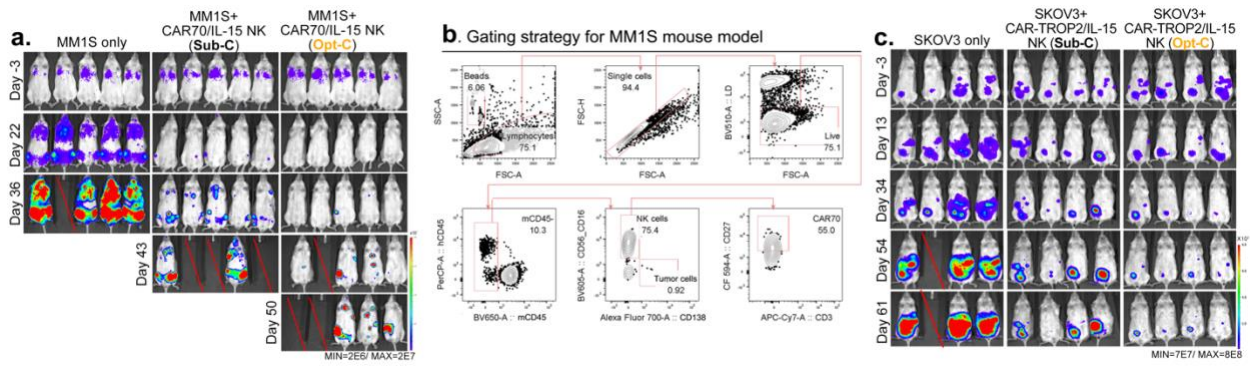

**Supplementary Figure 4. CAR-NK cells derived from Opt-Cs show superior anti-tumor effector function in MM1S and SKOV3 mouse models. (a)** BLI corresponding to the MM1S mouse model treated with CAR70/IL-15 NK cells described in **Extended Data Fig. 9i** **(b)** Gating strategies for NK cells and tumor cells for the *in vivo* MM1S mouse model experiments presented in **Extended Data Fig. 9**. **(c)** BLI corresponding to the SKOV3 mouse model treated with CAR-TROP2/IL-15 NK cells described in **Extended Data Fig. 9n**.

**Supplementary Tables**

**Supplementary Table 1. Patient, disease, donor cord blood unit (CBU) and CAR-NK characteristics in the dose escalation and dose expansion cohorts**

| Variable                                      | n (%)                         |                              |
|-----------------------------------------------|-------------------------------|------------------------------|
|                                               | Dose escalation cohort (n=11) | Dose expansion cohort (n=26) |
| <b>Patient characteristics</b>                |                               |                              |
| <b>Age</b>                                    |                               |                              |
| Median (range)                                | 60.0 (49-70)                  | 65.5 (26-79)                 |
| < 65 years                                    | 9 (81.8)                      | 10 (38.5)                    |
| ≥ 65 years                                    | 2 (18.2)                      | 16 (61.5)                    |
| <b>Sex</b>                                    |                               |                              |
| Male                                          | 7 (63.6)                      | 17 (65.4)                    |
| Female                                        | 4 (36.4)                      | 9 (34.6)                     |
| <b>Race</b>                                   |                               |                              |
| Caucasian                                     | 8 (72.7)                      | 23 (88.5)                    |
| Hispanic                                      | 0 (0.0)                       | 0 (0.0)                      |
| Black                                         | 0 (0.0)                       | 1 (3.8)                      |
| Asian                                         | 1 (9.1)                       | 1 (3.8)                      |
| Other                                         | 2 (18.2)                      | 1 (3.8)                      |
| <b>Weight</b>                                 |                               |                              |
| Median (kg/range)                             | 81.0 (60-138)                 | 77.9 (47-140)                |
| <b>Diagnosis</b>                              |                               |                              |
| Indolent lymphoma <sup>1</sup>                | 1 (9.1)                       | 5 (19.2)                     |
| CLL                                           | 4 (36.4)                      | 2 (7.7)                      |
| CLL-RT                                        | 1 (9.1)                       | 4 (15.4)                     |
| DLBCL                                         | 5 (45.5)                      | 12 (46.2)                    |
| Mantle cell lymphoma                          | 0 (0.0)                       | 1 (3.8)                      |
| Acute lymphoblastic leukemia                  | 0 (0.0)                       | 1 (3.8)                      |
| Lymphoplasmacytic lymphoma                    | 0 (0.0)                       | 1 (3.8)                      |
| <b>Karnofsky (%)</b>                          |                               |                              |
| Median (range)                                | 100 (90-100)                  | 90 (80-100)                  |
| <b>LDH prior to conditioning chemotherapy</b> |                               |                              |
| Median (range)                                | 422 (188-1715)                | 241 (141-1765)               |
| LDH>ULN                                       | 8 (72.7)                      | 16 (61.5)                    |
| <b>Number of prior therapies</b>              |                               |                              |
| Median (range)                                | 4 (3-10)                      | 4 (2-9)                      |
| ≥3 prior lines of therapy                     | 11 (100.0)                    | 20 (76.9)                    |
| <b>Prior stem cell transplant</b>             |                               |                              |
| Autologous                                    | 4 (36.4)                      | 5 (19.2)                     |
| Allogeneic                                    | 0 (0.0)                       | 1 (3.8)                      |
| <b>Disease status</b>                         |                               |                              |
| Relapsed                                      | 7 (63.6)                      | 4 (15.4)                     |
| Refractory to most recent therapy             | 2 (18.2)                      | 14 (53.8)                    |
| History of primary refractory disease         | 2 (18.2)                      | 8 (30.8)                     |
| <b>Disease stage<sup>2</sup></b>              |                               |                              |
| I or II                                       | 2 (33.3)                      | 6 (37.5)                     |
| III or IV                                     | 4 (66.6)                      | 10 (62.5)                    |

| Variable                           | n (%)                         |                              |
|------------------------------------|-------------------------------|------------------------------|
| CAR-NK characteristics             | Dose escalation cohort (n=11) | Dose expansion cohort (n=26) |
| <b>Dose level</b>                  |                               |                              |
| 1x10 <sup>5</sup> cells/kg         | 3 (27.3)                      | 0                            |
| 1x10 <sup>6</sup> cells/kg         | 4 (36.4)                      | 0                            |
| 1x10 <sup>7</sup> cells/kg         | 4 (36.4)                      | 11 (42.3)                    |
| 8x10 <sup>8</sup> cells flat dose  | 0                             | 15 (57.7)                    |
| <b>Mean fluorescence intensity</b> |                               |                              |
| Median (range)                     | 10875 (7510-36328)            | 13278 (4836-31618)           |
| 25% percentile                     | 8203                          | 10798                        |
| <b>Transduction efficiency (%)</b> |                               |                              |
| Median (range)                     | 49.0 (22.7-66.45)             | 77.4 (41.6-91.1)             |
| 25% percentile                     | 38.6                          | 65.9                         |
| <b>CD3+ T-cells infused/kg</b>     |                               |                              |
| Median (range)                     | 500 (30-8000)                 | 3000 (500-16000)             |

| Variable                   | n (%)                         |                              |
|----------------------------|-------------------------------|------------------------------|
| CBU characteristics        | Dose escalation cohort (n=11) | Dose expansion cohort (n=26) |
| <b>HLA allelic match</b>   |                               |                              |
| 0/6                        | 0                             | 5 (19.2)                     |
| 1/6                        | 1 (9.1)                       | 8 (30.8)                     |
| 2/6                        | 1 (9.1)                       | 1 (3.8)                      |
| 3/6                        | 0                             | 2 (7.7)                      |
| 4/6                        | 9 (81.8)                      | 10 (38.5)                    |
| <b>KIR ligand mismatch</b> |                               |                              |
| No                         | 8 (72.7)                      | 13 (50)                      |
| Yes                        | 3 (27.3)                      | 13 (50)                      |
| <b>Sex</b>                 |                               |                              |
| Male                       | 6 (54.5)                      | 16 (61.5)                    |
| Female                     | 5 (45.5)                      | 10 (38.5)                    |
| <b>CBU race</b>            |                               |                              |
| Asian                      | 1 (9.1)                       | 0                            |
| Black                      | 1 (9.1)                       | 0                            |
| Hispanic                   | 1 (9.1)                       | 10 (38.5)                    |
| Caucasian                  | 7 (63.6)                      | 16 (61.5)                    |
| Multiple                   | 1 (9.1)                       | 0                            |



|                                                                                 |                                 |                                  |
|---------------------------------------------------------------------------------|---------------------------------|----------------------------------|
| <b>Time from collection to freezing (hours)</b><br>Median (range)               | 24.3 (16.5-42.4)                | 24.5 (13.4-34.9)                 |
| <b>Pre-freezing CBU viability (%)</b><br>Median (range)                         | 99.0 (89-99)                    | 99.0 (91-100)                    |
| <b>Days in culture</b><br>Median (range)                                        | 15 (15-22)                      | 22 (15-22)                       |
| <b>TNC content (x10<sup>7</sup> cells)</b><br>Median (range)<br>25% percentile  | 124.8 (87.3-<br>248.8)<br>111.9 | 184.5 (124.1-<br>241.3)<br>162.5 |
| <b>NRBC content (x10<sup>7</sup> cells)</b><br>Median (range)<br>75% percentile | 3.2 (1.0-23.8)<br>2.8           | 5.2 (0.0-19.2)<br>2.7            |

Abbreviations: CLL: chronic lymphocytic leukemia; CLL-RT: chronic lymphocytic leukemia with Richter's transformation; DLBCL: diffuse large B cell lymphoma; LDH: lactate dehydrogenase; ULN: upper limit of normal; CBU: cord blood unit; TNC: total nucleated cell; NRBC: nucleated red blood cell.

<sup>1</sup>Four patients had follicular lymphoma and two patients had marginal zone lymphoma.

<sup>2</sup>Only for non-Hodgkin's lymphoma (NHL) patients.

**Supplementary Table 2. List of samples used in bulk RNA-seq and ATAC-seq analyses**

|              | <b>Sample</b> | <b>Donor</b> | <b>Replicate ID</b> | <b>Cord quality</b> |
|--------------|---------------|--------------|---------------------|---------------------|
| Bulk RNA-seq | C2-10         | EX47-14      | 3                   | optimal             |
|              | C2-1          | EX47-7       | 1                   | optimal             |
|              | C2-11         | EX47-13      | 1                   | optimal             |
|              | C2-12         | EX47-13      | 2                   | optimal             |
|              | C2-13         | EX47-13      | 3                   | optimal             |
|              | C2-2          | EX47-7       | 2                   | optimal             |
|              | C2-3          | EX47-7       | 3                   | optimal             |
|              | C2-4          | EX47-11      | 1                   | optimal             |
|              | C2-5          | EX47-11      | 2                   | optimal             |
|              | C2-6          | EX47-11      | 3                   | optimal             |
|              | C2-8          | EX47-14      | 1                   | optimal             |
|              | C2-9          | EX47-14      | 2                   | optimal             |
|              | D2-10         | EX47-15      | 2                   | optimal             |
|              | D2-11         | EX47-15      | 3                   | optimal             |
|              | D2-3          | EX47-16      | 1                   | optimal             |
|              | D2-4          | EX47-16      | 2                   | optimal             |
|              | D2-5          | EX47-16      | 3                   | suboptimal          |
|              | D2-6          | EX47-17      | 1                   | suboptimal          |
|              | D2-7          | EX47-17      | 2                   | suboptimal          |
|              | D2-8          | EX47-17      | 3                   | suboptimal          |
|              | D2-9          | EX47-15      | 1                   | suboptimal          |
|              | I1            | EX29-1       | 1                   | suboptimal          |
|              | I2            | EX29-1       | 2                   | suboptimal          |
|              | I3            | EX29-2       | 1                   | suboptimal          |
|              | I4            | EX29-2       | 2                   | suboptimal          |
|              | I5            | EX29-2       | 3                   | suboptimal          |
|              | I7            | EX29-4       | 1                   | suboptimal          |
|              | B11           | EX28-1       | 1                   | suboptimal          |
|              | B21           | EX28-1       | 2                   | suboptimal          |
|              | B31           | EX28-3       | 1                   | suboptimal          |
|              | S4            | EX27-4       | 1                   | optimal             |
|              | S5            | EX27-4       | 2                   | optimal             |
| <b>Total</b> | <b>32</b>     | <b>16</b>    |                     |                     |

|               |               |        |   |            |
|---------------|---------------|--------|---|------------|
| Bulk ATAC-seq | Sample_O4     | EX27-2 | 1 | optimal    |
|               | Sample_O5     | EX27-2 | 2 | optimal    |
|               | Sample_Ple_O7 | EX27-4 | 1 | optimal    |
|               | Sample_Ple_O8 | EX27-4 | 2 | optimal    |
|               | Sample_Ple_O9 | EX27-4 | 3 | optimal    |
|               | Sample_Ple_X1 | EX27-4 | 4 | optimal    |
|               | Sample_Ple_X2 | EX28-1 | 1 | optimal    |
|               | Sample_X7     | EX29-1 | 1 | optimal    |
|               | Sample_O1     | EX27-1 | 1 | suboptimal |
|               | Sample_O2     | EX27-1 | 2 | suboptimal |
|               | Sample_O3     | EX27-1 | 3 | suboptimal |
|               | Sample_O6     | EX27-3 | 1 | suboptimal |
|               | Sample_X3     | EX28-3 | 1 | suboptimal |
|               | Sample_X4     | EX28-3 | 2 | suboptimal |
|               | Sample_X5     | EX28-4 | 1 | suboptimal |
|               | Sample_X6     | EX28-4 | 2 | suboptimal |
|               | Sample_X8     | EX29-4 | 1 | suboptimal |
| Total         | 17            | 7      |   |            |
